# Supplementary material for: Ab initio investigations of circularly polarised luminescence in Samarium(iii)-based complexes
Source: Royal Society of Chemistry journal article supplement (doi:10.1039/d3cp05695c), 2024-01-01
Supplement: d3cp05695c1.pdf [file d3cp05695c1.pdf]

## Supporting information

Maxime Grasser,<sup>a</sup> and Boris Le Guennic<sup>\*a</sup>

<sup>a</sup>Univ Rennes, CNRS, ISCR (Institut des Sciences Chimiques de Rennes) UMR 6226, F-35000 Rennes, France.  
E-mail: boris.leguennic@univ-rennes.fr

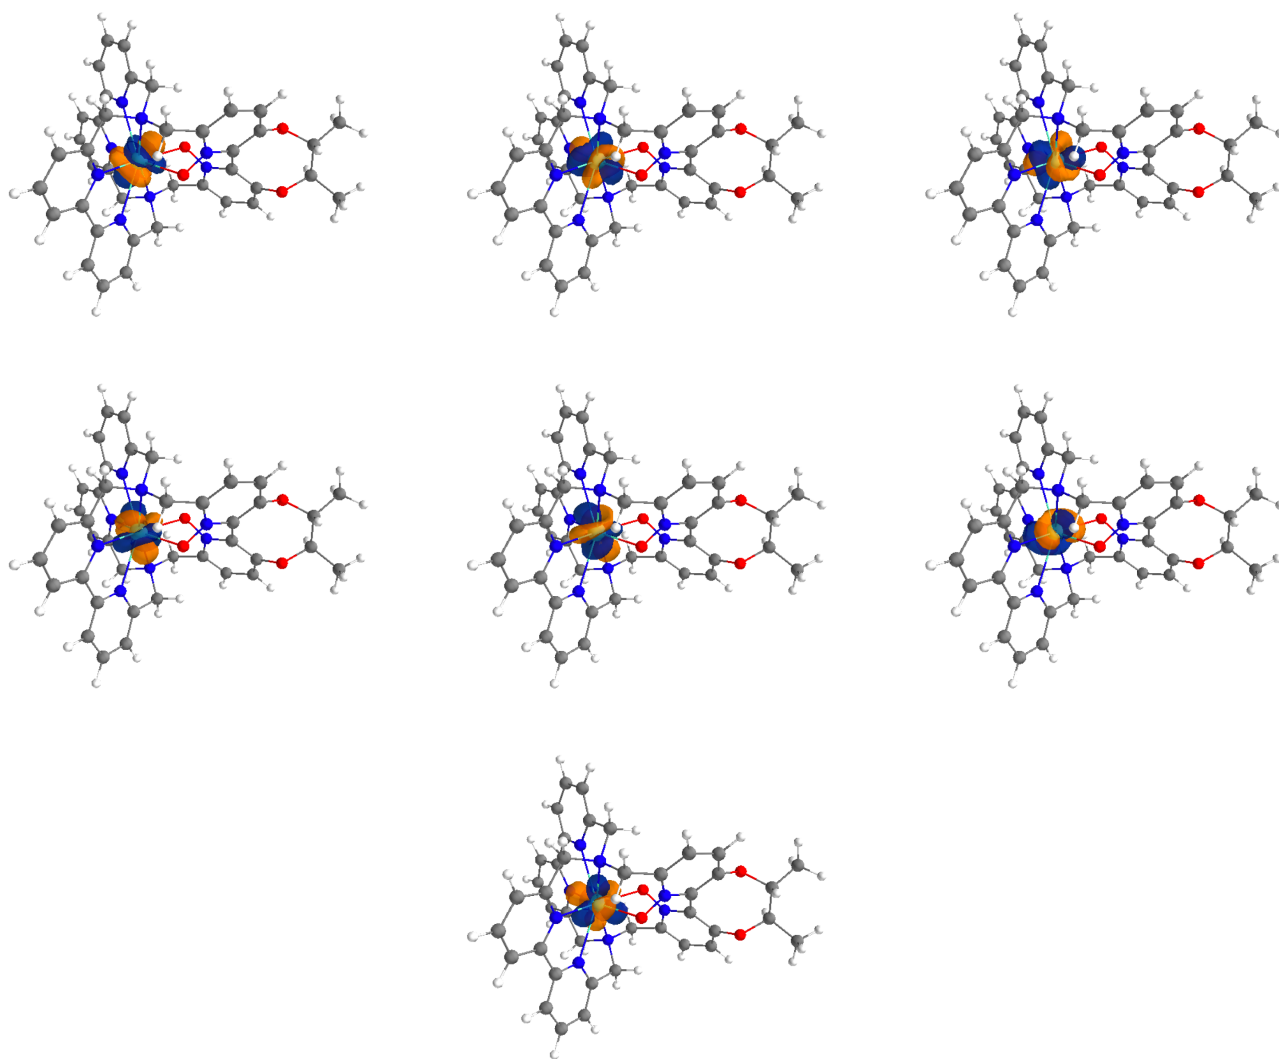

**Figure S1** Plot of the isosurfaces ( $\pm 0.03$  au) of the 4f state-averaged natural orbitals obtained at SA-CAS(5,7)SCF/RASSI-SO level of theory for  $[\text{Sm}^{\text{III}}(\text{cryptate})]^{3+}$  complex.

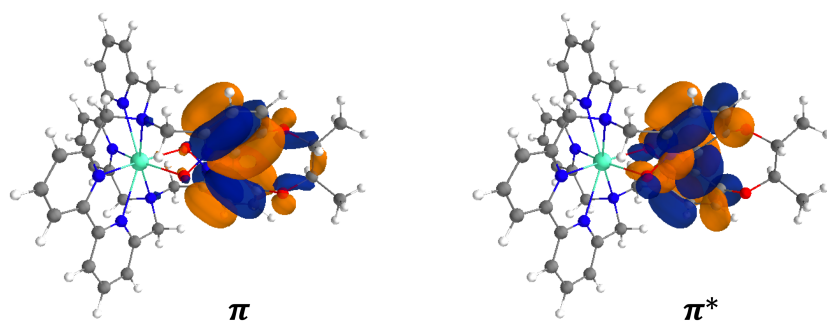

**Figure S2** Plot of the isosurfaces ( $\pm 0.03$  au) of the  $\pi$  and  $\pi^*$  state-averaged natural orbitals involved in the SA-RAS[7,1,1,1,7,1]SCF/RASSI-SO calculations for  $[\text{Sm}^{\text{III}}(\text{cryptate})]^{3+}$  complex.

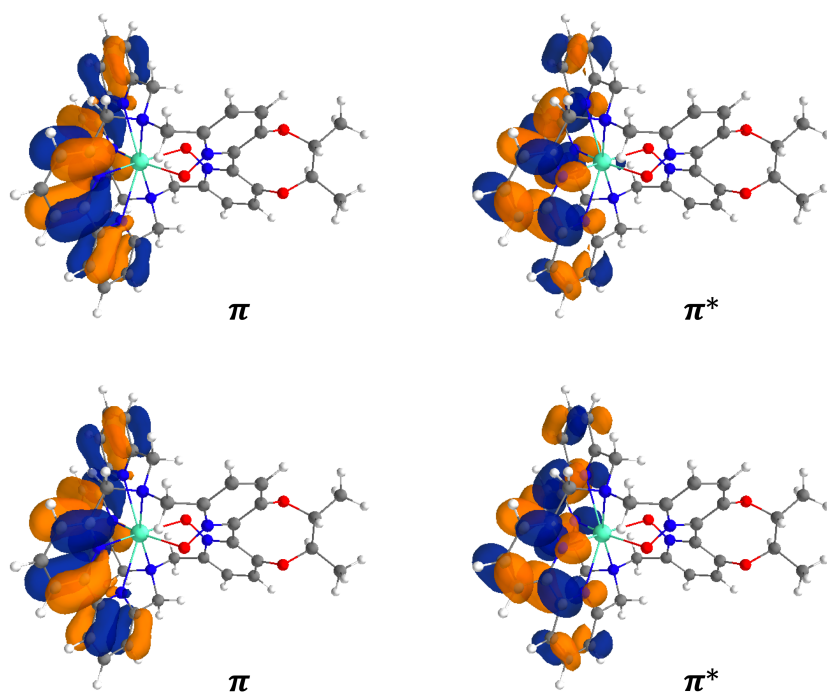

**Figure S3** Plot of the isosurfaces ( $\pm 0.03$  au) of the  $\pi$  and  $\pi^*$  state-averaged natural orbitals involved in the SA-RAS[9,1,1,2,7,2]SCF/RASSI-SO calculations for  $[\text{Sm}^{\text{III}}(\text{cryptate})]^{3+}$  complex.

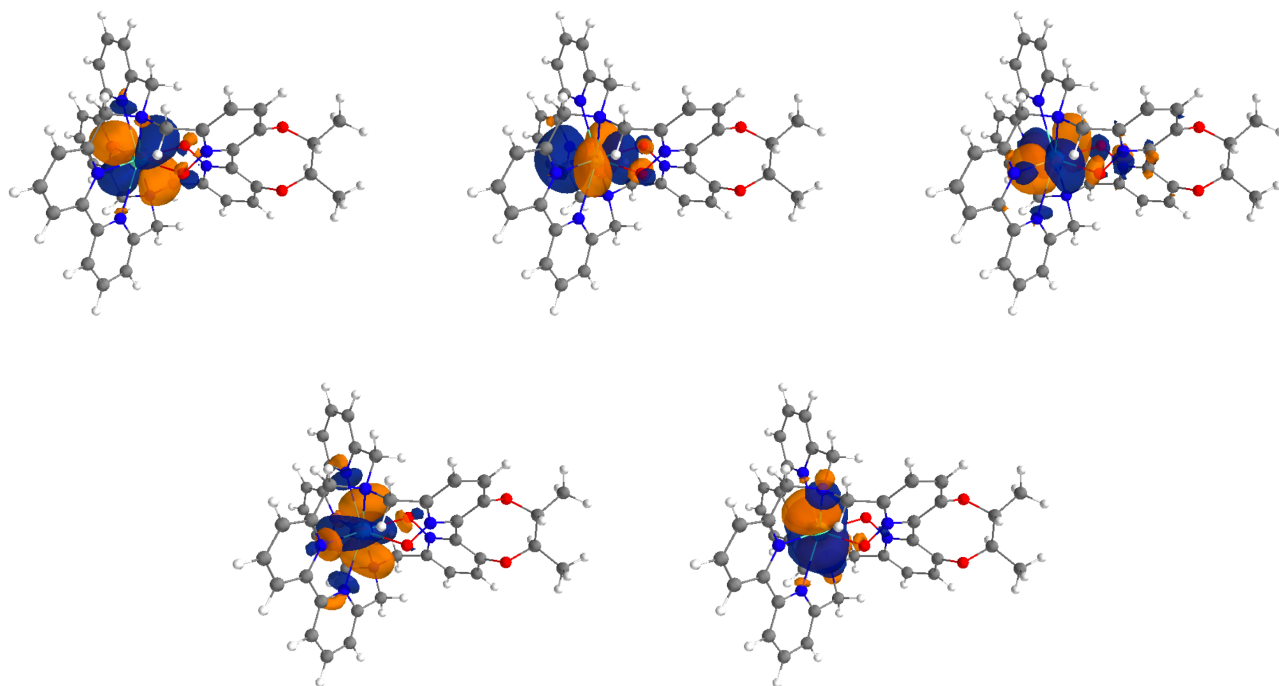

**Figure S4** Plot of the isosurfaces ( $\pm 0.03$  au) of the  $5d$  state-averaged natural orbitals involved in the SA-RAS[5,0,1,0,7,5]SCF/RASSI-SO calculations for  $[\text{Sm}^{\text{III}}(\text{cryptate})]^{3+}$  complex.

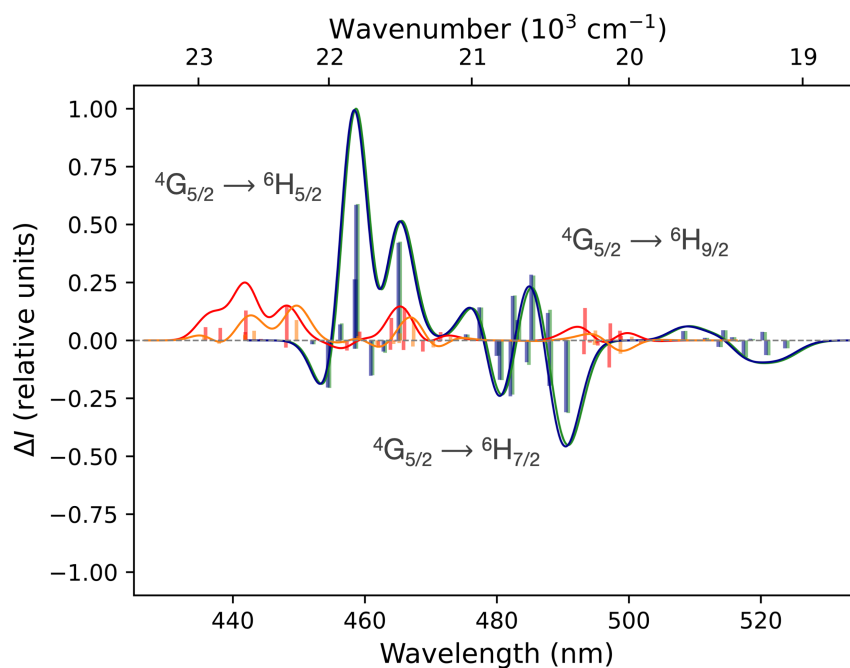

**Figure S5** Simulated CPL spectra of  $[\text{Sm}^{\text{III}}(\text{cryptate})]^{3+}$  with various number of CSFs for each spin multiplicity: RASSI 1 (orange) RASSI 2 (red) RASSI 3 (blue) RASSI 4 (green). Calculations were done at SA-CAS(5,7)SCF/RASSI-SO level of theory. Calculated rotatory strengths indicated as “stick” spectra. No energetic shift has been applied.

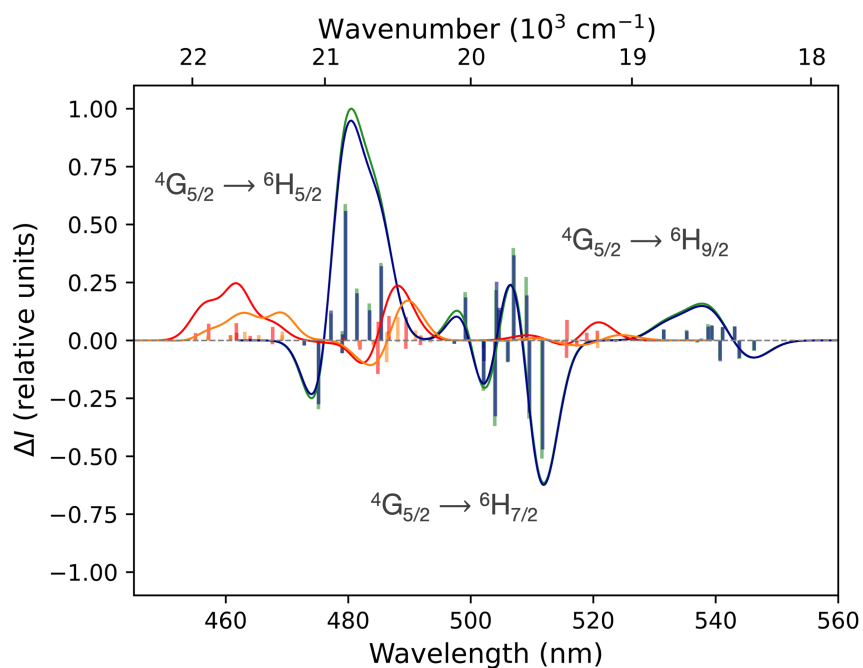

**Figure S6** Simulated CPL spectra of  $[\text{Sm}^{\text{III}}(\text{cryptate})]^{3+}$  with various numbers of CSFs for each spin multiplicity: 18, 48, 0 (orange) 32, 119, 32 (red) 39, 146, 130 (blue) 103, 229, 279 (green) for sextet, quartet and doublet, respectively. Calculations were done at the SA-RAS[7,1,1,1,7,1]SCF/RASSI-SO level of theory with the 7  $4f$  orbitals of Sm in RAS2 and 1  $\pi$  and 1  $\pi^*$  orbital of the tether in RAS1 and RAS3, respectively. Calculated rotatory strengths indicated as “stick” spectra. No energetic shift has been applied.

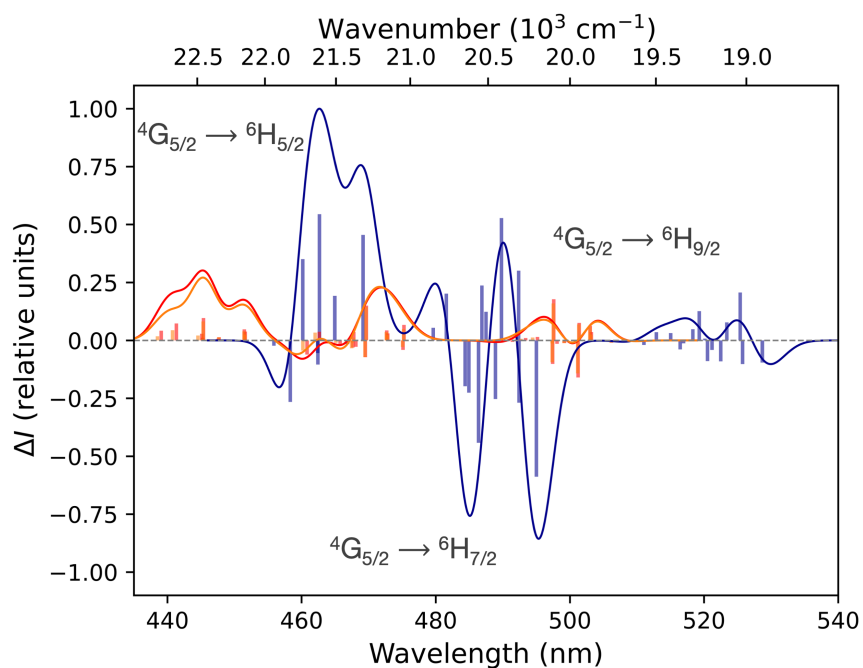

**Figure S7** Simulated CPL spectra of  $[\text{Sm}^{\text{III}}(\text{cryptate})]^{3+}$  with various numbers of CSFs for each spin multiplicity: 43, 130, 0 (orange) 43, 130, 32 (red) 57, 164, 92 (blue) for sextet, quartet and doublet respectively. Calculations were done at the SA-RAS[9,1,1,2,7,2]SCF/RASSI-SO level of theory with the 7  $4f$  orbitals of Sm in RAS2 and 2  $\pi$  and 2  $\pi^*$  orbitals of bipyridine units in RAS1 and RAS3 respectively. Calculated rotatory strengths indicated as "stick" spectra. No energetic shift has been applied.

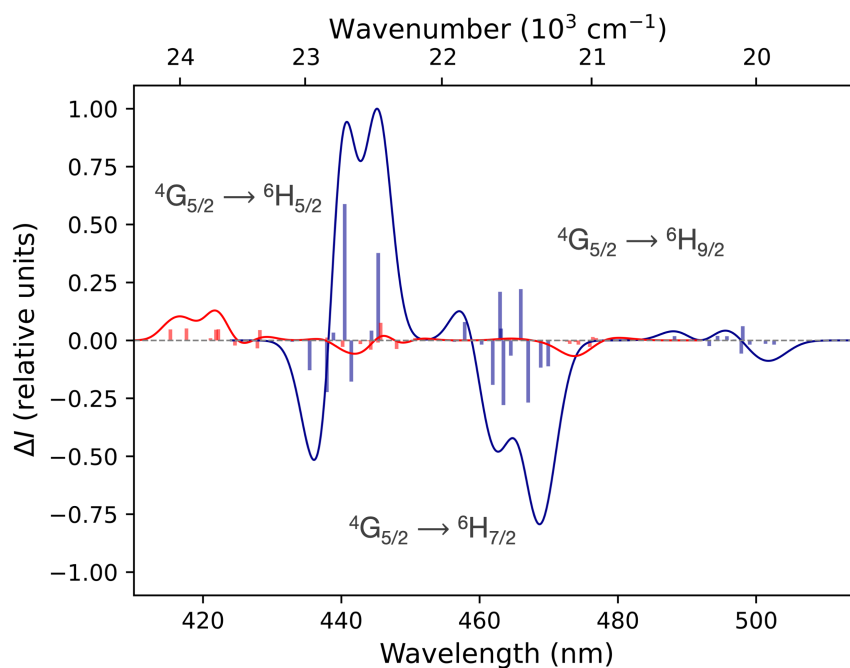

**Figure S8** Simulated CPL spectra of  $[\text{Sm}^{\text{III}}(\text{cryptate})]^{3+}$  with various numbers of CSFs for each spin multiplicity: 43, 108, 32 (red) 139, 440, 419 (blue) for sextet, quartet and doublet, respectively. Calculations were done at the SA-RAS[5,0,1,0,7,5]SCF/RASSI-SO level of theory with the 7  $4f$  orbitals in RAS2 and 5  $5d$  orbitals in RAS3 of Sm(III). Calculated rotatory strengths indicated as “stick” spectra. No energetic shift has been applied.

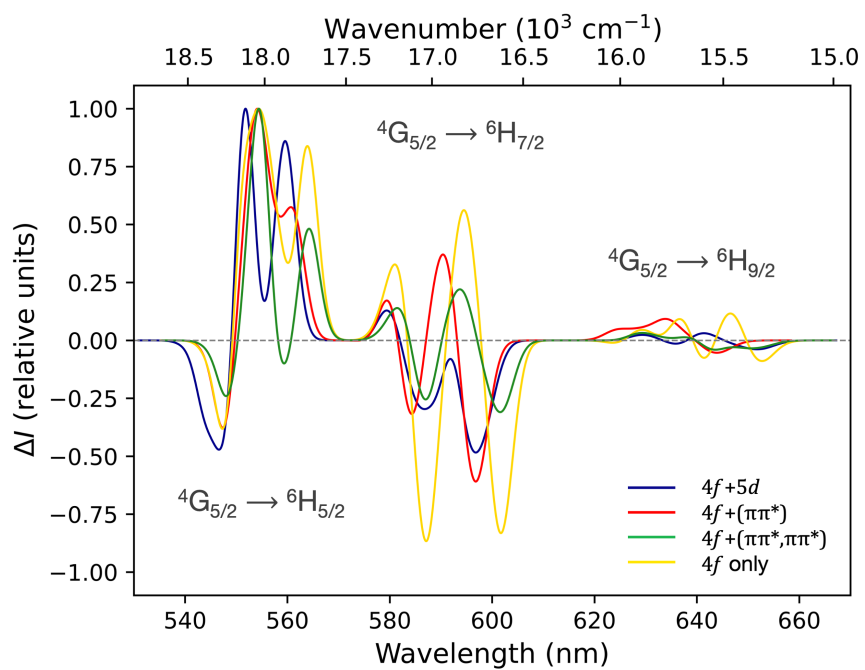

**Figure S9** Simulated CPL spectra of  $[\text{Sm}^{\text{III}}(\text{cryptate})]^{3+}$  similar to Figure 4 but with tiny full width at half maximum of  $152 \text{ cm}^{-1}$  and with all spectra normalised such as the transition at 554 nm is set up to 1.



**Table S1** Structural difference between the optimised structures of  $[\text{Sm}^{\text{III}}(\text{cryptate})]^{3+}$  in gas phase and in solvent (methanol), computed at the ZORA-PBE0/TZP DFT level of theory. To assign mentioned atoms, refer to Figure S10, and consider a symmetric assignment between the orange and the green part with a prime superscript for the atoms referring to the green part.

| part         | features              | atoms involved  | gas phase | methanol |
|--------------|-----------------------|-----------------|-----------|----------|
| orange-green | angle (deg.)          | H1-Sm-H1'       | 105.36    | 107.66   |
|              | distance (Å)          | C1-C2           | 1.484     | 1.482    |
| orange       | angle (deg.)          | N1-Sm-N2        | 64.63     | 64.80    |
|              | dihedral angle (deg.) | N1-C1-C2-N2     | 8.03      | 6.43     |
|              | dihedral angle (deg.) | N2-C3-C4-N3     | 34.48     | 34.85    |
|              | distance (Å)          | C1'-C2'         | 1.484     | 1.482    |
| green        | angle (deg.)          | N1'-Sm-N2'      | 64.63     | 64.80    |
|              | dihedral angle (deg.) | N1'-C1'-C2'-N2' | 8.03      | 6.43     |
|              | dihedral angle (deg.) | N2'-C3'-C4'-N3' | 34.48     | 34.86    |
|              | dihedral angle (deg.) | N4-C5-C6-N5     | 49.31     | 50.70    |
| grey         | dihedral angle (deg.) | O1-C7-C8-O2     | 51.64     | 54.83    |
|              | dihedral angle (deg.) | C9-C7-C8-C10    | 70.14     | 67.13    |

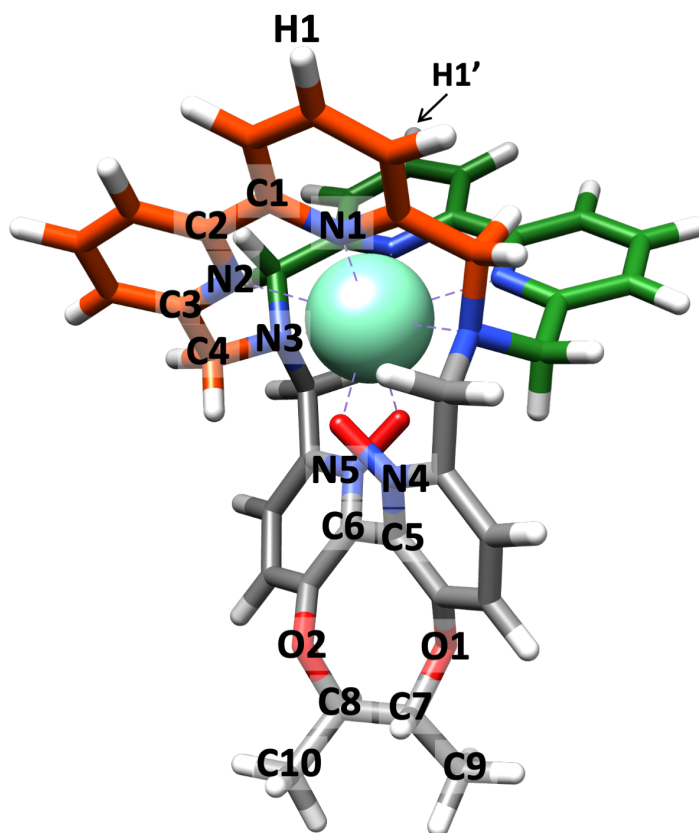

**Figure S10** Structure of the  $[\text{Sm}^{\text{III}}(\text{cryptate})]^{3+}$  complex obtained from DFT structural optimization, computed at ZORA-PBE0/TZP in gas phase. The ligand has been divided into three parts for which carbon atoms are coloured in orange, green or grey. Otherwise, the color code is sea-green, Sm; red, O; blue, N; white, H.

**Table S2** Calculated energy  $E$ , rotatory strength  $R$  and oscillator strengths  $f$  for  ${}^4G_{5/2} \rightarrow {}^6H_J$  transitions with  $J = 5/2, 7/2, 9/2$  at RT from  $2'$  to  $0'$   $m_J$  emissive sublevels. Calculations done at SA-CAS(5,7)SCF/RASSI-SO level of theory for two optimised structures of  $[Sm^{III}(\text{cryptate})]^{3+}$  either in methanol or in gas phase.

| transition                            | in MeOH           |           |           |          | in gas            |           |           |          |          |
|---------------------------------------|-------------------|-----------|-----------|----------|-------------------|-----------|-----------|----------|----------|
|                                       | $E$ (cm $^{-1}$ ) | $R$ (cgs) | $f_{ED}$  | $f_{MD}$ | $E$ (cm $^{-1}$ ) | $R$ (cgs) | $f_{ED}$  | $f_{MD}$ |          |
| ${}^4G_{5/2} \rightarrow {}^6H_{5/2}$ | $2'$              | 21725     | -1.52e-44 | 1.88e-09 | 2.11e-09          | 21800     | -8.26e-45 | 1.30e-09 | 1.03e-09 |
|                                       |                   | 21915     | -9.99e-44 | 1.96e-09 | 9.40e-10          | 21995     | -4.71e-44 | 1.28e-09 | 4.63e-10 |
|                                       |                   | 22029     | -6.62e-45 | 3.27e-10 | 1.28e-10          | 22111     | -3.87e-45 | 2.26e-10 | 6.81e-11 |
|                                       | $1'$              | 21509     | -7.35e-45 | 6.43e-10 | 1.93e-09          | 21595     | -1.22e-44 | 4.49e-10 | 1.00e-09 |
|                                       |                   | 21699     | 2.68e-43  | 2.59e-09 | 3.42e-09          | 21790     | 1.35e-43  | 1.65e-09 | 1.62e-09 |
|                                       |                   | 21813     | 3.66e-44  | 2.67e-09 | 5.03e-09          | 21906     | 1.68e-44  | 2.75e-09 | 2.20e-09 |
|                                       | $0'$              | 21422     | 1.82e-43  | 3.30e-09 | 2.75e-09          | 21489     | 9.78e-44  | 1.91e-09 | 1.27e-09 |
|                                       |                   | 21612     | -2.69e-44 | 1.00e-08 | 5.07e-09          | 21684     | -3.45e-44 | 9.24e-09 | 2.54e-09 |
|                                       |                   | 21726     | 1.00e-43  | 1.87e-09 | 6.72e-09          | 21800     | 6.04e-44  | 2.06e-09 | 3.69e-09 |
| ${}^4G_{5/2} \rightarrow {}^6H_{7/2}$ | $2'$              | 20612     | 5.40e-44  | 4.82e-10 | 1.51e-09          | 20685     | 2.02e-44  | 2.11e-10 | 7.57e-10 |
|                                       |                   | 20717     | -9.54e-44 | 2.35e-09 | 8.61e-10          | 20800     | -3.94e-44 | 9.97e-10 | 3.91e-10 |
|                                       |                   | 20855     | 6.78e-44  | 3.79e-09 | 2.29e-10          | 20935     | 3.25e-44  | 1.69e-09 | 1.41e-10 |
|                                       |                   | 20950     | 1.81e-44  | 3.52e-09 | 3.52e-10          | 21026     | 5.86e-45  | 1.38e-09 | 1.65e-10 |
|                                       | $1'$              | 20396     | -8.20e-44 | 7.95e-09 | 1.18e-09          | 20480     | -4.49e-44 | 3.32e-09 | 5.64e-10 |
|                                       |                   | 20502     | 1.41e-43  | 6.60e-09 | 1.31e-09          | 20595     | 6.42e-44  | 3.54e-09 | 6.36e-10 |
|                                       |                   | 20639     | -1.75e-43 | 7.54e-09 | 1.76e-09          | 20730     | -5.37e-44 | 1.82e-09 | 1.18e-09 |
|                                       |                   | 20734     | 9.25e-46  | 1.38e-08 | 4.05e-09          | 20821     | -1.51e-44 | 6.37e-09 | 1.52e-09 |
|                                       | $0'$              | 20309     | -2.32e-43 | 1.75e-08 | 5.76e-10          | 20374     | -7.20e-44 | 6.97e-09 | 2.31e-10 |
|                                       |                   | 20415     | 1.64e-43  | 2.08e-08 | 2.95e-09          | 20489     | 3.03e-44  | 1.05e-08 | 1.62e-09 |
|                                       |                   | 20552     | -1.05e-44 | 1.68e-08 | 8.16e-09          | 20624     | -2.43e-44 | 6.87e-09 | 3.49e-09 |
|                                       |                   | 20647     | 1.93e-44  | 3.40e-08 | 3.26e-09          | 20715     | 4.45e-44  | 1.68e-08 | 2.31e-09 |
| ${}^4G_{5/2} \rightarrow {}^6H_{9/2}$ | $2'$              | 19320     | 1.68e-45  | 6.70e-10 | 3.01e-12          | 19392     | 9.27e-46  | 4.47e-10 | 1.72e-12 |
|                                       |                   | 19433     | -4.57e-46 | 1.92e-09 | 5.88e-12          | 19518     | -6.26e-46 | 1.04e-09 | 2.74e-12 |
|                                       |                   | 19507     | 2.43e-45  | 2.62e-10 | 1.11e-11          | 19584     | 1.04e-45  | 8.96e-11 | 5.05e-12 |
|                                       |                   | 19588     | 1.84e-44  | 1.05e-09 | 5.15e-11          | 19662     | 9.43e-45  | 6.20e-10 | 2.66e-11 |
|                                       |                   | 19657     | -1.86e-45 | 5.93e-10 | 5.66e-12          | 19740     | -9.44e-46 | 3.26e-10 | 3.77e-12 |
|                                       | $1'$              | 19104     | -3.29e-44 | 3.62e-09 | 3.88e-11          | 19187     | -1.48e-44 | 1.85e-09 | 2.07e-11 |
|                                       |                   | 19217     | -3.23e-44 | 5.87e-09 | 3.94e-11          | 19313     | -1.67e-44 | 3.38e-09 | 2.15e-11 |
|                                       |                   | 19291     | 1.82e-45  | 3.00e-09 | 5.15e-11          | 19379     | 3.23e-45  | 1.67e-09 | 2.73e-11 |
|                                       |                   | 19372     | -1.63e-44 | 6.57e-10 | 9.04e-11          | 19457     | -6.71e-45 | 2.59e-10 | 3.39e-11 |
|                                       |                   | 19441     | 3.30e-45  | 1.31e-08 | 5.10e-11          | 19535     | 2.56e-45  | 6.91e-09 | 2.84e-11 |
|                                       | $0'$              | 19017     | -1.79e-44 | 2.82e-09 | 1.51e-11          | 19081     | -7.85e-45 | 1.25e-09 | 8.52e-12 |
|                                       |                   | 19130     | 2.04e-44  | 2.11e-09 | 2.85e-11          | 19207     | 8.28e-45  | 7.72e-10 | 1.84e-11 |
|                                       |                   | 19204     | 6.73e-45  | 4.58e-09 | 5.52e-11          | 19273     | 1.33e-45  | 2.51e-09 | 4.02e-11 |
|                                       |                   | 19285     | -6.80e-45 | 6.51e-10 | 1.26e-10          | 19351     | -1.37e-45 | 2.59e-10 | 5.91e-11 |
|                                       |                   | 19354     | 2.40e-44  | 3.12e-09 | 3.09e-11          | 19429     | 1.00e-44  | 1.42e-09 | 1.31e-11 |

**Table S3** Energetic splitting of four spectroscopic levels of  $[\text{Sm}^{\text{III}}(\text{cryptate})]^{3+}$  complex, at SA-RAS[7,1,1,1,7,1]SCF/RASSI-SO level of theory.

| Spectroscopic term   | Kramres doublets | Energy ( $\text{cm}^{-1}$ ) |
|----------------------|------------------|-----------------------------|
| ${}^4\text{G}_{5/2}$ | 2'               | 21 149                      |
|                      | 1'               | 20 956                      |
|                      | 0'               | 20 874                      |
| ${}^6\text{H}_{9/2}$ | 4                | 2 570                       |
|                      | 3                | 2 462                       |
|                      | 2                | 2 395                       |
|                      | 1                | 2 335                       |
|                      | 0                | 2 275                       |
| ${}^6\text{H}_{7/2}$ | 3                | 1 333                       |
|                      | 2                | 1 234                       |
|                      | 1                | 1 116                       |
|                      | 0                | 1 042                       |
| ${}^6\text{H}_{5/2}$ | 2                | 273                         |
|                      | 1                | 103                         |
|                      | 0                | 0                           |

**Table S4** Boltzmann population in percentage of the Kramers doublets composing the emissive  ${}^4\text{G}_{5/2}$  level at various temperatures for  $[\text{Sm}^{\text{III}}(\text{cryptate})]^{3+}$  complex, at SA-RAS[7,1,1,1,7,1]SCF/RASSI-SO level of theory.

| Kramers doublets | 0K  | 60K | 120K | 180K | 240K | 298K |
|------------------|-----|-----|------|------|------|------|
| 2'               | 0   | 0   | 3    | 7    | 11   | 14   |
| 1'               | 0   | 12  | 27   | 32   | 34   | 35   |
| 0'               | 100 | 87  | 71   | 61   | 55   | 51   |

**Table S5** Calculated energy  $E$ , rotatory strength  $R$  and oscillator strengths  $f$  for  ${}^4G_{5/2} \rightarrow {}^6H_J$  transitions with  $J = 5/2, 7/2, 9/2$  at RT from  $2'$  to  $0'$   $m_J$  emissive sublevels. Calculations done at SA-RAS[7,1,1,1,7,1]SCF/RASSI-SO level of theory for  $[\text{Sm}^{\text{III}}(\text{cryptate})]^{3+}$ .

| transition                            | $E$ (cm $^{-1}$ )                     | $R$ (cgs) | $f_{\text{ED}}$ | $f_{\text{MD}}$ |          |          |
|---------------------------------------|---------------------------------------|-----------|-----------------|-----------------|----------|----------|
| ${}^4G_{5/2} \rightarrow {}^6H_{5/2}$ | 2'                                    | 20875     | -3.52e-44       | 4.34e-10        | 2.26e-09 |          |
|                                       |                                       | 21045     | -1.77e-43       | 3.54e-09        | 1.00e-09 |          |
|                                       |                                       | 21148     | -1.38e-44       | 6.41e-10        | 1.32e-10 |          |
|                                       | 1'                                    | 20682     | 8.34e-44        | 4.51e-09        | 2.10e-09 |          |
|                                       |                                       | 20852     | 3.58e-43        | 5.43e-09        | 3.17e-09 |          |
|                                       |                                       | 20955     | 8.28e-44        | 1.21e-09        | 4.56e-09 |          |
|                                       |                                       | 20601     | 2.05e-43        | 3.87e-09        | 2.22e-09 |          |
|                                       |                                       | 20770     | 1.30e-43        | 4.38e-09        | 4.90e-09 |          |
|                                       |                                       | 20874     | 1.68e-44        | 2.37e-09        | 6.70e-09 |          |
|                                       | ${}^4G_{5/2} \rightarrow {}^6H_{7/2}$ | 2'        | 19815           | 9.05e-44        | 1.80e-09 | 1.75e-09 |
|                                       |                                       |           | 19914           | -1.23e-43       | 5.04e-09 | 7.44e-10 |
|                                       |                                       |           | 20033           | 1.19e-43        | 1.12e-08 | 3.02e-10 |
| 20106                                 |                                       |           | -1.01e-44       | 7.61e-09        | 3.78e-10 |          |
| 1'                                    |                                       | 19622     | -2.00e-43       | 1.64e-08        | 9.21e-10 |          |
|                                       |                                       | 19721     | 2.35e-43        | 2.28e-08        | 1.68e-09 |          |
|                                       |                                       | 19840     | -2.10e-43       | 1.08e-08        | 2.27e-09 |          |
|                                       |                                       | 19913     | -5.72e-44       | 3.47e-08        | 3.12e-09 |          |
|                                       |                                       | 19540     | -3.02e-43       | 4.27e-08        | 4.59e-10 |          |
| 0'                                    |                                       | 19639     | 1.24e-43        | 5.32e-08        | 2.85e-09 |          |
|                                       |                                       | 19758     | -5.89e-44       | 3.25e-08        | 6.32e-09 |          |
|                                       |                                       | 19832     | 1.62e-43        | 7.72e-08        | 4.01e-09 |          |
|                                       | 18579                                 | 1.00e-45  | 5.91e-09        | 3.44e-12        |          |          |
| ${}^4G_{5/2} \rightarrow {}^6H_{9/2}$ | 2'                                    | 18686     | 1.99e-45        | 1.10e-08        | 5.58e-12 |          |
|                                       |                                       | 18753     | 1.96e-45        | 1.56e-09        | 7.79e-12 |          |
|                                       |                                       | 18813     | 2.89e-44        | 5.44e-09        | 5.02e-11 |          |
|                                       |                                       | 18874     | -1.27e-45       | 1.09e-09        | 7.11e-12 |          |
|                                       |                                       | 18385     | -4.87e-44       | 1.38e-08        | 3.82e-11 |          |
|                                       | 1'                                    | 18493     | -5.79e-44       | 3.58e-08        | 3.69e-11 |          |
|                                       |                                       | 18560     | 3.80e-44        | 2.41e-08        | 4.77e-11 |          |
|                                       |                                       | 18620     | -4.30e-45       | 2.25e-09        | 4.53e-11 |          |
|                                       |                                       | 18681     | 2.55e-44        | 4.87e-08        | 4.48e-11 |          |
|                                       |                                       | 18304     | -2.83e-44       | 1.15e-08        | 1.34e-11 |          |
|                                       |                                       | 18411     | 3.87e-44        | 1.23e-08        | 2.87e-11 |          |
|                                       |                                       | 18478     | 3.71e-44        | 2.30e-08        | 6.30e-11 |          |
| 0'                                    | 18538                                 | 4.05e-44  | 1.62e-08        | 7.75e-11        |          |          |
|                                       | 18599                                 | 4.96e-45  | 4.78e-08        | 1.26e-11        |          |          |

**Table S6** Energetic splitting of four spectroscopic levels of  $\text{Sm}^{\text{III}}(\text{hfac})_3(i\text{Pr-PyBox})$  complex, at SA-CAS(5,7)SCF/RASSI-SO level of theory.

| Spectroscopic term   | Kramres doublets | Energy ( $\text{cm}^{-1}$ ) |
|----------------------|------------------|-----------------------------|
| ${}^4\text{G}_{5/2}$ | 2'               | 22 057                      |
|                      | 1'               | 21 966                      |
|                      | 0'               | 21 871                      |
| ${}^6\text{H}_{9/2}$ | 4                | 2 568                       |
|                      | 3                | 2 534                       |
|                      | 2                | 2 501                       |
|                      | 1                | 2 403                       |
|                      | 0                | 2 375                       |
| ${}^6\text{H}_{7/2}$ | 3                | 1 287                       |
|                      | 2                | 1 248                       |
|                      | 1                | 1 172                       |
|                      | 0                | 1 067                       |
| ${}^6\text{H}_{5/2}$ | 2                | 187                         |
|                      | 1                | 141                         |
|                      | 0                | 0                           |

**Table S7** Boltzmann population in percentage of the Kramers doublets composing the emissive  ${}^4\text{G}_{5/2}$  level at various temperatures for  $\text{Sm}^{\text{III}}(\text{hfac})_3(i\text{Pr-PyBox})$  complex, at SA-CAS(5,7)SCF/RASSI-SO level of theory.

| Kramers doublets | 0K  | 60K | 120K | 180K | 240K | 298K |
|------------------|-----|-----|------|------|------|------|
| 2'               | 0   | 1   | 8    | 13   | 17   | 20   |
| 1'               | 0   | 9   | 22   | 28   | 30   | 31   |
| 0'               | 100 | 90  | 70   | 59   | 53   | 49   |

**Table S8** Calculated energy  $E$ , rotatory strength  $R$  and oscillator strengths  $f$  for  ${}^4G_{5/2} \rightarrow {}^6H_J$  transitions with  $J = 5/2, 7/2, 9/2$  at RT from  $2'$  to  $0'$   $m_J$  emissive sublevels. Calculations done at SA-CAS(5,7)SCF/RASSI-SO level of theory for  $\text{Sm}^{\text{III}}(\text{hfac})_3(\text{}^i\text{Pr-PyBox})$ .

| transition                            | $E$ ( $\text{cm}^{-1}$ ) | $R$ (cgs) | $f_{\text{ED}}$ | $f_{\text{MD}}$ |          |
|---------------------------------------|--------------------------|-----------|-----------------|-----------------|----------|
| ${}^4G_{5/2} \rightarrow {}^6H_{5/2}$ | $2'$                     | 21869     | -6.44e-45       | 1.10e-10        | 3.02e-09 |
|                                       |                          | 21915     | -3.42e-44       | 1.34e-10        | 2.25e-09 |
|                                       |                          | 22057     | -8.21e-45       | 3.26e-10        | 1.14e-10 |
|                                       | $1'$                     | 21778     | -2.78e-46       | 3.56e-10        | 3.66e-09 |
|                                       |                          | 21825     | -8.84e-45       | 7.35e-10        | 2.63e-09 |
|                                       |                          | 21966     | -2.25e-44       | 2.06e-10        | 2.30e-09 |
|                                       |                          | 21683     | -1.11e-44       | 5.62e-10        | 6.99e-10 |
|                                       |                          | 21729     | 1.20e-43        | 5.95e-10        | 3.99e-09 |
|                                       |                          | 21870     | 8.92e-44        | 1.50e-09        | 9.67e-09 |
| ${}^4G_{5/2} \rightarrow {}^6H_{7/2}$ | $2'$                     | 20770     | -4.07e-44       | 4.86e-09        | 1.86e-09 |
|                                       |                          | 20808     | 2.86e-44        | 9.51e-09        | 2.21e-09 |
|                                       |                          | 20884     | -1.51e-44       | 1.83e-09        | 7.09e-10 |
|                                       |                          | 20989     | 1.66e-44        | 1.22e-08        | 2.26e-10 |
|                                       | $1'$                     | 20679     | 2.27e-44        | 8.31e-09        | 2.12e-09 |
|                                       |                          | 20717     | -6.33e-44       | 1.12e-08        | 1.42e-09 |
|                                       |                          | 20793     | 2.74e-43        | 1.58e-08        | 2.71e-09 |
|                                       |                          | 20898     | -1.73e-43       | 2.09e-08        | 1.61e-09 |
|                                       |                          | 20583     | 4.41e-44        | 1.53e-08        | 6.76e-10 |
| $0'$                                  | 20622                    | 1.26e-44  | 9.62e-09        | 1.32e-09        |          |
|                                       | 20698                    | -4.21e-43 | 4.36e-08        | 3.42e-09        |          |
|                                       | 20803                    | 2.87e-43  | 1.27e-08        | 6.86e-09        |          |
|                                       | 19488                    | 8.12e-46  | 2.25e-09        | 1.35e-12        |          |
| ${}^4G_{5/2} \rightarrow {}^6H_{9/2}$ | $2'$                     | 19523     | 1.94e-45        | 2.55e-09        | 2.07e-12 |
|                                       |                          | 19555     | 6.41e-45        | 2.31e-09        | 4.28e-12 |
|                                       |                          | 19654     | 2.99e-45        | 1.42e-09        | 4.76e-12 |
|                                       |                          | 19681     | 1.39e-45        | 3.10e-09        | 3.40e-12 |
|                                       |                          | 19397     | 4.48e-45        | 1.75e-09        | 7.23e-12 |
|                                       | $1'$                     | 19432     | -2.35e-45       | 8.68e-10        | 8.62e-12 |
|                                       |                          | 19464     | 1.03e-44        | 2.66e-09        | 7.73e-12 |
|                                       |                          | 19563     | 6.84e-45        | 1.42e-09        | 1.08e-11 |
|                                       |                          | 19590     | 2.24e-45        | 5.07e-10        | 7.25e-12 |
| $0'$                                  | 19302                    | -3.05e-44 | 4.64e-09        | 2.80e-11        |          |
|                                       | 19337                    | -1.79e-44 | 3.62e-09        | 1.31e-11        |          |
|                                       | 19369                    | -6.04e-45 | 7.40e-09        | 2.40e-11        |          |
|                                       | 19467                    | -8.63e-45 | 2.07e-09        | 6.59e-11        |          |
|                                       | 19495                    | 4.54e-45  | 2.10e-09        | 2.11e-11        |          |
